# Supplementary material
Source: Research Square preprint supplement (doi:10.21203/rs.3.rs-8937526/v1)
Supplement: Supplementary file 1 [file 04b89a6d02b4ea3e91d68ca8.pdf]

# X-ray AI TB (TBScreen.AI): Development of Artificial Intelligence for X-ray-Based Tuberculosis Screening in Remote Areas of Indonesia

INTERVIEWER:  
SUPERVISOR:

\_\_\_\_\_  
\_\_\_\_\_

**CONFIDENTIAL**

ID: \_\_\_\_\_

## EXIT INTERVIEW

### Form 00 – Informed Consent

**INSTRUCTIONS FOR ENUMERATORS:** ENSURE THAT A PLACE/ROOM WITH ADEQUATE PRIVACY IS USED FOR THIS INTERVIEW AND THAT NO OTHER PERSON IS PRESENT EXCEPT THE ENUMERATOR AND THE RESPONDENT AND THE PATIENT'S COMPANION (IF ANY).

My name is \_\_\_\_\_, and I am an enumerator for the study entitled "X- ray AI TB: Artificial Intelligence Development for X- ray- Based Tuberculosis Screening in Remote Areas of Indonesia", which is implemented by the Center for Tropical Medicine, Faculty of Medicine, Public Health, and Nursing, Gadjah Mada University.

The aim of this study is to collect information regarding access to tuberculosis health services in Indonesia.

The research team will collect information in the form of personal data and medical history interviews, photos, videos, and voice recordings. The information collected in this study will be kept confidential. You were randomly selected as a representative of the community receiving tuberculosis-related health services. We greatly appreciate your honesty in providing answers. This interview will last approximately 45 minutes.

Your participation is voluntary. You may end your participation at any time if you feel uncomfortable. You may also decline to answer certain questions. You may express the need to be accompanied by a sibling/husband/wife/child or translator in completing this survey or request that the questions be repeated and the answers read back.

I will answer your questions regarding this survey, and if you have any questions or concerns, or would like to know more information about this study, please contact Dr. Antonia Morita Iswari Saktiawati from Gadjah Mada University (email: [a.morita@ugm.ac.id](mailto:a.morita@ugm.ac.id), phone: +62 812-2797-6434) or dr. Aulia Shafira from Gadjah Mada University (email: [auliash96@gmail.com](mailto:auliash96@gmail.com), phone: +62 822-3036-6870).

Do you have any questions about this survey?

|                                                     |        |       |
|-----------------------------------------------------|--------|-------|
| LP01. Are you willing to take part in this survey?  | 1. YES | 3. NO |
| LP02. Do you agree to have this interview recorded? | 1. YES | 3. NO |

SIGNATURE

DATE

\_\_\_\_\_

\_\_\_\_\_

## FORM (MR)

**(filled in by hospital staff/enumerator from patient medical records)**

**Instruction for enumerators:** Fill in the following information based on the patient's medical record.

| <b>PATIENT MEDICAL RECORD</b>                |                                             |
|----------------------------------------------|---------------------------------------------|
| <b>MR01.</b> Data entry date                 | _ _   _ _   _ _                             |
| <b>MR02.</b> Patient's name                  | _____                                       |
| <b>MR03.</b> Patient's gender                | 01. Male<br>03. Women                       |
| <b>MR04.</b> Patient's medical record number | _ _ _   _ _   _ _   _ _   _ _ _ _           |
| <b>MR05.</b> Patient's date of birth         | _ _   _ _   _ _                             |
| <b>MR06.</b> Current residential address     | _____                                       |
| <b>MR07.</b> Phone number                    | _ _ _ _   _ _ _ _ _   _ _ _ _ _   _ _ _ _ _ |
| <b>MR08.</b> Height                          | _ _ _  cm                                   |
| <b>MR09.</b> Weight                          | _ _ _  kg                                   |

| <b>TB CLASSIFICATION</b>                                          |                                                                                                                                                           |
|-------------------------------------------------------------------|-----------------------------------------------------------------------------------------------------------------------------------------------------------|
| <b>MR10.</b> Patient type                                         | 01. TB<br>02. Non-TB                                                                                                                                      |
| <b>MR11.</b> TB status                                            | 01. New Diagnosis<br>02. Relapse / Reinfection<br>03. Drop out / treatment failure / lost-to-follow-up / unexpected treatment outcome<br>99. Other, _____ |
| <b>MR12.</b> Types of TB                                          | 01. Active TB<br>02. Clinical TB<br>03. Latent TB                                                                                                         |
| <b>MR13.</b> Location<br><i>(can select more than one option)</i> | A. Lungs<br>B. Extrapulmonary                                                                                                                             |
| <b>MR14.</b> Bacteriology                                         | 01. Positive<br>02. Negative                                                                                                                              |
| <b>MR15.</b> Bacteriology test result                             | 01. BTA positive<br>02. MTB detected in Xpert MTB/Rif examination<br>03. Positive culture                                                                 |
| <b>MR16.</b> TB sensitivity status                                | 01. drug-sensitive TB<br>02. MDR-TB<br>03. Pre -XDR TB<br>04. XDR-TB<br>05. Other TB drug resistance<br>06. Not yet known                                 |

| <b>TB TEST RESULTS</b>                                                               |                                                                                                                 |
|--------------------------------------------------------------------------------------|-----------------------------------------------------------------------------------------------------------------|
| <b>MR17.</b> Chest X- ray test results                                               | 01. Normal<br>02. Abnormalities leading to TB<br>03. Abnormal does not indicate TB<br>04. No photos/information |
| <b>MR18.</b> Abnormalities leading to TB<br><i>(can select more than one option)</i> | A. Infiltrate<br>B. Cavity<br>C. Consolidation<br>D. Effusion<br>E. Classification<br>F. Other, _____           |
| <b>MR19.</b> Are there any spirometry test results?                                  | 01. Yes<br>02. No                                                                                               |
| <b>MR20.</b> Spirometry test results                                                 | _____                                                                                                           |
| <b>MR21.</b> Results of other tests (e.g. pathology, blood tests (IGRA, Mantoux ))   | _____                                                                                                           |

| <b>Co-morbidities</b>                                                  |                                                                                            |
|------------------------------------------------------------------------|--------------------------------------------------------------------------------------------|
| <b>MR22.</b> Does the patient have any comorbidities?                  | 01. Yes<br>03. No <b>DMR24</b>                                                             |
| <b>MR23.</b> Comorbidities<br><i>(can select more than one option)</i> | A. HIV/AIDS<br>B. Diabetes<br>C. COPD (chronic obstructive pulmonary disease)<br>D. Asthma |

|  |                                                                                                                                                              |
|--|--------------------------------------------------------------------------------------------------------------------------------------------------------------|
|  | E. Bronchitis<br>F. Bronchiectasis<br>G. Pulmonary fibrosis<br>H. Lung abscess<br>I. Empyema<br>J. Polycystic lung disease<br>K. COVID-19<br>L. Other, _____ |
|--|--------------------------------------------------------------------------------------------------------------------------------------------------------------|

| <b>TREATMENT</b>                                                             |                                                                                                                                                     |
|------------------------------------------------------------------------------|-----------------------------------------------------------------------------------------------------------------------------------------------------|
| <b>MR24.</b> Is the patient currently receiving TB treatment?                | 01. Yes<br>03. No <input type="checkbox"/> <b>MR28</b>                                                                                              |
| <b>MR25.</b> Control week<br><br><i>(Fill in 0 if there is no data)</i>      | _____                                                                                                                                               |
| <b>MR26.</b> Control month<br><br><i>(Fill in 0 if there is no data)</i>     | _____                                                                                                                                               |
| <b>MR27.</b> TB medication<br><br><i>(e.g. OAT category 1, etc.)</i>         | 01. Category I (new Pulmonary)<br>02. Category II (retreatment)<br>03. Category III (new ss - or Extra-Pulmonary)<br>04. Category IV (chronic, MDR) |
| <b>MR28.</b> Is the patient currently receiving treatment other than for TB? | 01. Yes<br>03. No                                                                                                                                   |
| <b>MR29.</b> Patient payment types                                           | A. BPJS-Kesehatan/private insurance<br>B. Non-insurance payment                                                                                     |

**TB SCORING FORM FOR CHILDREN**  
**(filled in by hospital staff/enumerator from patient medical records)**

**Instruction for enumerators:** Fill in the following information based on the patient's medical record.

| <b>PAEDIATRIC PATIENT MEDICAL RECORDS</b>                        |                                                           |
|------------------------------------------------------------------|-----------------------------------------------------------|
| <b>MR30.</b> Was children TB scoring conducted for this patient? | 01. Yes<br>03. No <input type="checkbox"/> <b>FORM 01</b> |
| <b>MR31.</b> Paediatric TB Scoring in Medical Records            | _____                                                     |

| <b>PARAMETER</b>                                                      | <b>0</b>                   | <b>1</b>                               | <b>2</b>                                        | <b>3</b>                                                     | <b>Score</b> |
|-----------------------------------------------------------------------|----------------------------|----------------------------------------|-------------------------------------------------|--------------------------------------------------------------|--------------|
| <b>MR32.</b> TB Contact                                               | Unclear                    | -                                      | Family report, BTA (-)/ BTA unclear/ don't know | BTA (+)                                                      |              |
| <b>MR33.</b> Tuberculin test (Mantoux)                                | Negative                   | -                                      | -                                               | Positive ( $\geq$ 10 mm or $\geq$ 5 mm in immunocompromised) |              |
| <b>MR34.</b> Body Weight/Nutritional Status                           | -                          | BB/TB<90% or BB/U<80%                  | Clinical malnutrition or BB/TB<70% or BB/U<60%  | -                                                            |              |
| <b>MR35.</b> Fever of unknown cause                                   | -                          | $\geq$ 2 weeks                         | -                                               | -                                                            |              |
| <b>MR36.</b> Chronic cough                                            | -                          | $\geq$ 3 weeks                         | -                                               | -                                                            |              |
| <b>MR37.</b> Enlarged lymph nodes colli, axilla, inguinal             | -                          | $\geq$ 1 cm, more than 1 KGB, no pain  | -                                               | -                                                            |              |
| <b>MR38.</b> Swelling of the bones/joints of the hip, knee, phalanges | -                          | There is swelling                      | -                                               | -                                                            |              |
| <b>MR39.</b> Chest X-ray                                              | Normal/unclear abnormality | Suggestive (supportive) features of TB | -                                               | -                                                            |              |
| <b>Total SCORE (maximum 13)</b>                                       |                            |                                        |                                                 |                                                              |              |

**FORM 01 EXIT INTERVIEW (EX)**  
**(filled in by the enumerator from the patient interview)**

**Instruction for enumerators:** Fill in the following information based on where the patient was recruited / interviewed.

|                                                                                                        |                                                                                                                                                                                                                                                                                                                                                                                      |  |  |  |  |  |  |
|--------------------------------------------------------------------------------------------------------|--------------------------------------------------------------------------------------------------------------------------------------------------------------------------------------------------------------------------------------------------------------------------------------------------------------------------------------------------------------------------------------|--|--|--|--|--|--|
| <b>EX01.</b> Data entry date                                                                           | <table border="1" style="display: inline-table; border-collapse: collapse;"> <tr> <td style="width: 20px; height: 20px;"> </td> </tr> </table> |  |  |  |  |  |  |
|                                                                                                        |                                                                                                                                                                                                                                                                                                                                                                                      |  |  |  |  |  |  |
| <b>EX02.</b> Name of Hospital/Healthcare Facility<br><br><i>(Enumerator Note: No need to read out)</i> | 01. Klaten Health Center<br>02. Sardjito Hospital<br>03. Timika Regency Regional Hospital<br>04. Respira Hospital<br>05. Other, _____                                                                                                                                                                                                                                                |  |  |  |  |  |  |

**Instruction for enumerators:** Read the following statement to the patient:  
*"I will start by asking you some questions about your personal information."*

|                                                                                                                           |                                                                                                                                                     |
|---------------------------------------------------------------------------------------------------------------------------|-----------------------------------------------------------------------------------------------------------------------------------------------------|
| <b>PATIENT DATA</b>                                                                                                       |                                                                                                                                                     |
| <b>EX03.</b> Please state your name                                                                                       | _____                                                                                                                                               |
| <b>EX04.</b> Is there anyone else/respondent who helps the patient answer questions?<br><i>(not asked to respondents)</i> | 01. Yes<br><br>03. No <input type="checkbox"/> <b>FORM 02</b>                                                                                       |
| <b>EX05.</b> Name of respondent/companion                                                                                 | _____                                                                                                                                               |
| <b>EX06.</b> What is the relationship between the companion and the patient?                                              | 01. Parent<br>02. Grandparents<br>03. You<br>04. Aunt/Uncle<br>05. Caregiver<br>06. Companion nurse<br>07. Partner<br>08. Child<br>09. Other, _____ |

**FORM 02 BASIC DATA (BA)**  
**(filled in by the enumerator from the patient interview)**

**Enumerator Instructions:** Read the following statement to the patient:

"I will ask you some questions about your personal information."

**Note for enumerator:** If the patient is accompanied, adjust the narrative of the questions below. Information is still asked about the patient (not the companion).

| <b>BACKGROUND DATA (BA)</b>                                                                                                                                                                                                                 |                                                                                                                                                                                                                                                                                                                                                                                                                                                                                                                                                                                                                                                                                      |                                                                                                                                                                                                                                 |                                                                                                                                                                                                                             |
|---------------------------------------------------------------------------------------------------------------------------------------------------------------------------------------------------------------------------------------------|--------------------------------------------------------------------------------------------------------------------------------------------------------------------------------------------------------------------------------------------------------------------------------------------------------------------------------------------------------------------------------------------------------------------------------------------------------------------------------------------------------------------------------------------------------------------------------------------------------------------------------------------------------------------------------------|---------------------------------------------------------------------------------------------------------------------------------------------------------------------------------------------------------------------------------|-----------------------------------------------------------------------------------------------------------------------------------------------------------------------------------------------------------------------------|
| <b>BA01.</b> Patient's gender<br><br>(Instruction for enumerators, read: "For this study, we were asked to categorize the respondents' gender. The following are the options: male, female, and other. Which option is most appropriate?"). | 01. Male<br>03. Female<br>95. Others<br>99. Refused to answer                                                                                                                                                                                                                                                                                                                                                                                                                                                                                                                                                                                                                        |                                                                                                                                                                                                                                 |                                                                                                                                                                                                                             |
| <b>BA02.</b> How old are you?                                                                                                                                                                                                               | _____ year                                                                                                                                                                                                                                                                                                                                                                                                                                                                                                                                                                                                                                                                           |                                                                                                                                                                                                                                 |                                                                                                                                                                                                                             |
| <b>BA03.</b> What is your address of residence?                                                                                                                                                                                             | _____                                                                                                                                                                                                                                                                                                                                                                                                                                                                                                                                                                                                                                                                                |                                                                                                                                                                                                                                 |                                                                                                                                                                                                                             |
| <b>BA04.</b> Is your area of residence categorised as rural or urban?                                                                                                                                                                       | 01. Urban<br>02. Rural                                                                                                                                                                                                                                                                                                                                                                                                                                                                                                                                                                                                                                                               |                                                                                                                                                                                                                                 |                                                                                                                                                                                                                             |
| <b>BA05.</b> What is your telephone number?                                                                                                                                                                                                 | _____                                                                                                                                                                                                                                                                                                                                                                                                                                                                                                                                                                                                                                                                                |                                                                                                                                                                                                                                 |                                                                                                                                                                                                                             |
| <b>BA06.</b> How tall are you?                                                                                                                                                                                                              | _____ cm                                                                                                                                                                                                                                                                                                                                                                                                                                                                                                                                                                                                                                                                             |                                                                                                                                                                                                                                 |                                                                                                                                                                                                                             |
| <b>BA07.</b> How much do you weigh?                                                                                                                                                                                                         | _____ kg                                                                                                                                                                                                                                                                                                                                                                                                                                                                                                                                                                                                                                                                             |                                                                                                                                                                                                                                 |                                                                                                                                                                                                                             |
| <b>BA08.</b> Have you ever had TB before?                                                                                                                                                                                                   | 01. Yes<br>02. Never                                                                                                                                                                                                                                                                                                                                                                                                                                                                                                                                                                                                                                                                 |                                                                                                                                                                                                                                 |                                                                                                                                                                                                                             |
| <b>BA09.</b> Do you currently smoke?                                                                                                                                                                                                        | 01. Yes<br>03. No                                                                                                                                                                                                                                                                                                                                                                                                                                                                                                                                                                                                                                                                    |                                                                                                                                                                                                                                 |                                                                                                                                                                                                                             |
| <b>BA10.</b> What is your religion?                                                                                                                                                                                                         | 01. Islam<br>02. Catholic<br>03. Protestant<br>04. Hindu<br>05. Buddha<br>06. Confucianism<br>95. Others, _____                                                                                                                                                                                                                                                                                                                                                                                                                                                                                                                                                                      |                                                                                                                                                                                                                                 |                                                                                                                                                                                                                             |
| <b>BA11.</b> What is your ethnicity?                                                                                                                                                                                                        | <table style="width: 100%; border: none;"> <tr> <td style="width: 50%; border: none;">           01. Java<br/>02. Sunda<br/>03. Bali<br/>04. Batak<br/>05. Bugis<br/>06. Chinese<br/>07. Madura<br/>08. Sasak<br/>09. Minang<br/>10. Banjar<br/>11. Bima - Dompu<br/>12. Makassar<br/>13. Nias<br/>14. Palembang<br/>15. Sumbawa<br/>16. Toraja         </td> <td style="width: 50%; border: none;">           17. Betawi<br/>18. Dayak<br/>19. Malay<br/>20. Komerling<br/>21. Ambon<br/>22. Manado<br/>23. Aceh<br/>24. Other South Sumatran People<br/>25. Banten<br/>26. Cirebon<br/>27. Gorontalo<br/>28. Kutai<br/>29. Papua<br/>95. Other, _____         </td> </tr> </table> | 01. Java<br>02. Sunda<br>03. Bali<br>04. Batak<br>05. Bugis<br>06. Chinese<br>07. Madura<br>08. Sasak<br>09. Minang<br>10. Banjar<br>11. Bima - Dompu<br>12. Makassar<br>13. Nias<br>14. Palembang<br>15. Sumbawa<br>16. Toraja | 17. Betawi<br>18. Dayak<br>19. Malay<br>20. Komerling<br>21. Ambon<br>22. Manado<br>23. Aceh<br>24. Other South Sumatran People<br>25. Banten<br>26. Cirebon<br>27. Gorontalo<br>28. Kutai<br>29. Papua<br>95. Other, _____ |
| 01. Java<br>02. Sunda<br>03. Bali<br>04. Batak<br>05. Bugis<br>06. Chinese<br>07. Madura<br>08. Sasak<br>09. Minang<br>10. Banjar<br>11. Bima - Dompu<br>12. Makassar<br>13. Nias<br>14. Palembang<br>15. Sumbawa<br>16. Toraja             | 17. Betawi<br>18. Dayak<br>19. Malay<br>20. Komerling<br>21. Ambon<br>22. Manado<br>23. Aceh<br>24. Other South Sumatran People<br>25. Banten<br>26. Cirebon<br>27. Gorontalo<br>28. Kutai<br>29. Papua<br>95. Other, _____                                                                                                                                                                                                                                                                                                                                                                                                                                                          |                                                                                                                                                                                                                                 |                                                                                                                                                                                                                             |
| <b>BA12.</b> Papuan Tribe<br>(specifically for respondents who identify themselves as Papuan)                                                                                                                                               | 01. Papua 7 main tribes (specific for Mimika study site)<br>02. Papua non-7 main tribes (specific for Mimika study site) <b>BA14</b>                                                                                                                                                                                                                                                                                                                                                                                                                                                                                                                                                 |                                                                                                                                                                                                                                 |                                                                                                                                                                                                                             |
| <b>BA13.</b> Seven Main Tribes of Papua (specific for Mimika study site)                                                                                                                                                                    | 01. Kamoro<br>02. Amungme<br>03. Dani<br>04. Damal<br>05. Nduga<br>06. Mee / Ekari<br>07. Moni                                                                                                                                                                                                                                                                                                                                                                                                                                                                                                                                                                                       |                                                                                                                                                                                                                                 |                                                                                                                                                                                                                             |
| <b>BA14.</b> Non-seven main tribes of Papua (specific for Mimika study site)                                                                                                                                                                | 01. Biak<br>02. Serui<br>95. Others, _____                                                                                                                                                                                                                                                                                                                                                                                                                                                                                                                                                                                                                                           |                                                                                                                                                                                                                                 |                                                                                                                                                                                                                             |
| <b>BA15.</b> Apart from Indonesian, what language do you commonly use?                                                                                                                                                                      | <table style="width: 100%; border: none;"> <tr> <td style="width: 50%; border: none;">           01. Java<br/>02. Sundanese language<br/>03. Bali<br/>04. Batak<br/>05. Bugis         </td> <td style="width: 50%; border: none;">           13. Nias<br/>14. Palembang<br/>15. Sumbawa<br/>16. Toraja<br/>17. Lahat         </td> </tr> </table>                                                                                                                                                                                                                                                                                                                                    | 01. Java<br>02. Sundanese language<br>03. Bali<br>04. Batak<br>05. Bugis                                                                                                                                                        | 13. Nias<br>14. Palembang<br>15. Sumbawa<br>16. Toraja<br>17. Lahat                                                                                                                                                         |
| 01. Java<br>02. Sundanese language<br>03. Bali<br>04. Batak<br>05. Bugis                                                                                                                                                                    | 13. Nias<br>14. Palembang<br>15. Sumbawa<br>16. Toraja<br>17. Lahat                                                                                                                                                                                                                                                                                                                                                                                                                                                                                                                                                                                                                  |                                                                                                                                                                                                                                 |                                                                                                                                                                                                                             |

|                                                                                                     |                                                                                                                                                               |                                                                                                                                          |
|-----------------------------------------------------------------------------------------------------|---------------------------------------------------------------------------------------------------------------------------------------------------------------|------------------------------------------------------------------------------------------------------------------------------------------|
|                                                                                                     | 06. China<br>07. Madura<br>08. Sasak<br>09. Minang language<br>10. Banjar language<br>11. Bima language<br>12. Makassar                                       | 18. Other South Sumatra<br>19. Betawi<br>20. Lampung<br>21. Papuan language<br>95. Others, _____<br>96. NO <input type="checkbox"/> BA19 |
| <b>BA16.</b> Papuan language<br>(specifically for respondents who stated "Papuan language" in BA15) | 01. Papua 7 main tribes (in Mimika)<br>02. Papua non-7 main tribes (in Mimika) <input type="checkbox"/> BA18                                                  |                                                                                                                                          |
| <b>BA17.</b> Languages of the Seven Main Tribes of Papua<br>(in Mimika)                             | 01. Kamoro language<br>02. Amungme language<br>03. Dani language<br>04. Damal language<br>05. Nduga language<br>06. Mee / Ekari Language<br>07. Moni language |                                                                                                                                          |
| <b>BA18.</b> Non-language of the seven main tribes of Papua<br>(in Mimika)                          | 01. Biak language<br>02. Serui language<br>95. Others, _____                                                                                                  |                                                                                                                                          |

### FAMILY AND HOUSEHOLD INFORMATION

**Enumerator Instructions:** Read the following statement to the patient:

"I will ask you some questions about your personal information and your household."

|                                                             |                                                                                                                                                                                                                                                                                                                                                                                               |                                                                                                                                                                                                                                                                                                                              |
|-------------------------------------------------------------|-----------------------------------------------------------------------------------------------------------------------------------------------------------------------------------------------------------------------------------------------------------------------------------------------------------------------------------------------------------------------------------------------|------------------------------------------------------------------------------------------------------------------------------------------------------------------------------------------------------------------------------------------------------------------------------------------------------------------------------|
| <b>BA19.</b> Do you currently work?                         | 01. Yes<br>03. No <input type="checkbox"/> BA22                                                                                                                                                                                                                                                                                                                                               |                                                                                                                                                                                                                                                                                                                              |
| <b>BA20.</b> What kind of work do you do?                   | 01. Civil Servants/Government Employees<br>02. TNI/Polri (TNI/Polri)<br>03. Private sector employees/company staff<br>04. Entrepreneur / self-employed<br>05. Traders (retailers/street vendors/traditional markets)<br>06. Farmers/plantation workers<br>07. Livestock breeders/fishermen<br>08. Farm labourers / plantation workers / fishing workers<br>09. Construction workers/labourers | 10. Domestic workers (housemaids, domestic assistants)<br>11. Teacher / lecturer / educator<br>12. Health workers (doctors, midwives, nurses, etc.)<br>13. Drivers/Transportation Workers (including online motorcycle taxis)<br>14. Freelance/odd work<br>15. Unemployed / never worked<br>16. Retired<br>95. Others: _____ |
| <b>BA21.</b> What is your average monthly income?           | Rp <input type="text"/>                                                                                                                                                                          |                                                                                                                                                                                                                                                                                                                              |
|                                                             | 99. Refuse to answer                                                                                                                                                                                                                                                                                                                                                                          |                                                                                                                                                                                                                                                                                                                              |
| <b>BA22.</b> What is your marital status?                   | 01. Not married <input type="checkbox"/> BA26<br>02. Married<br>03. Living together with a partner<br>04. Divorced <input type="checkbox"/> BA26<br>05. Separated <input type="checkbox"/> BA26<br>06. Widower/divorcee (divorced due to death) <input type="checkbox"/> BA26                                                                                                                 |                                                                                                                                                                                                                                                                                                                              |
| <b>BA23.</b> Does your partner work?                        | 01. Yes<br>03. No <input type="checkbox"/> BA26                                                                                                                                                                                                                                                                                                                                               |                                                                                                                                                                                                                                                                                                                              |
| <b>BA24.</b> What type of work does your partner do?        | 01. Civil Servants/Government Employees<br>02. TNI/Polri (TNI/Polri)<br>03. Private sector employees/company staff<br>04. Entrepreneur / self-employed<br>05. Traders (retailers/street vendors/traditional markets)<br>06. Farmers/plantation workers<br>07. Livestock breeders/fishermen<br>08. Farm laborers / plantation workers / fishing workers<br>09. Construction workers/labourers  | 10. Domestic workers (housemaids, domestic assistants)<br>11. Teacher / lecturer / educator<br>12. Health workers (doctors, midwives, nurses, etc.)<br>13. Drivers/Transportation Workers (including online motorcycle taxis)<br>14. Freelance/odd work<br>15. Unemployed / never worked<br>16. Retired<br>95. Others: _____ |
| <b>BA25.</b> What is your partner's average monthly income? | Rp <input type="text"/>                                                                                                                                                                          |                                                                                                                                                                                                                                                                                                                              |
| <b>BA26.</b> How many people live in your house?            | <input type="text"/> <input type="text"/> <input type="text"/> people                                                                                                                                                                                                                                                                                                                         |                                                                                                                                                                                                                                                                                                                              |
| <b>BA27.</b> Do you live together with the following... ?   | Yes                                                                                                                                                                                                                                                                                                                                                                                           | No                                                                                                                                                                                                                                                                                                                           |

|                                                                                         |                          |                          |
|-----------------------------------------------------------------------------------------|--------------------------|--------------------------|
| <i>(read each category)</i>                                                             |                          |                          |
| BA19a People with disabilities                                                          | <input type="checkbox"/> | <input type="checkbox"/> |
| BA19b Pregnant women                                                                    | <input type="checkbox"/> | <input type="checkbox"/> |
| BA19c 60 years and above                                                                | <input type="checkbox"/> | <input type="checkbox"/> |
| BA19d People with weakened immune systems<br>(diabetes, cancer, other chronic diseases) | <input type="checkbox"/> | <input type="checkbox"/> |
| BA19e Children under 5 years                                                            | <input type="checkbox"/> | <input type="checkbox"/> |
| BA19f Children under 12 years                                                           | <input type="checkbox"/> | <input type="checkbox"/> |

**FORM 03 DISABILITY DATA (DS)**  
**(filled in by the enumerator from the patient interview)**

**DISABILITY DATA (DS)**

**Notes for enumerators:**

Enumerators need to explicitly ask each respondent if they have a disability to ensure that no one is missed due to a disability that is not directly visible/physical. Even if the respondent is clearly disabled (for example, using a wheelchair or a white cane for the visually impaired), the question should still be asked for confirmation and accurate recording.

**Instruction for enumerators:** Read the following statement to the patient:

*"I will ask for information about any disabilities, obstacles, or other chronic illnesses you may have. First, please indicate whether you have "no difficulty," "some difficulty," "a lot of difficulty," or "absolutely no difficulty."*

|                                                                                                                                                    |                                                                                                                                                                                                                                                                                                                                                                                                                                                                                                                                                  |                                |                                   |                             |                                              |
|----------------------------------------------------------------------------------------------------------------------------------------------------|--------------------------------------------------------------------------------------------------------------------------------------------------------------------------------------------------------------------------------------------------------------------------------------------------------------------------------------------------------------------------------------------------------------------------------------------------------------------------------------------------------------------------------------------------|--------------------------------|-----------------------------------|-----------------------------|----------------------------------------------|
| <b>DS01.</b> Have you had difficulty seeing for more than the last 6 months?                                                                       | 01. No difficulty<br><input type="checkbox"/> <b>DS03</b>                                                                                                                                                                                                                                                                                                                                                                                                                                                                                        | 02. Having a little difficulty | 03. Many experienced difficulties | 04. Absolutely not possible | N/A<br><input type="checkbox"/> <b>DS03</b>  |
| <b>DS02.</b> Do you have difficulty seeing even when wearing glasses?                                                                              | 01. No difficulty                                                                                                                                                                                                                                                                                                                                                                                                                                                                                                                                | 02. Having a little difficulty | 03. Having a lot of difficulties  | 04. Absolutely not possible | N/A                                          |
| <b>DS03.</b> Have you had difficulty hearing for more than the last 6 months?                                                                      | 01. No difficulty<br><input type="checkbox"/> <b>DS05</b>                                                                                                                                                                                                                                                                                                                                                                                                                                                                                        | 02. Having a little difficulty | 03. Having a lot of difficulties  | 04. Absolutely not possible | N/A<br><input type="checkbox"/> <b>DS05</b>  |
| <b>DS04.</b> Do you have difficulty hearing even though you use a hearing aid/translator?                                                          | 01. No difficulty                                                                                                                                                                                                                                                                                                                                                                                                                                                                                                                                | 02. Having a little difficulty | 03. Having a lot of difficulties  | 04. Absolutely not possible | N/A                                          |
| <b>DS05.</b> Have you had difficulty walking or moving, holding, reaching, climbing stairs for more than the last 6 months?                        | 01. No difficulty<br><input type="checkbox"/> <b>DS07</b>                                                                                                                                                                                                                                                                                                                                                                                                                                                                                        | 02. Having a little difficulty | 03. Having a lot of difficulties  | 04. Absolutely not possible | N/A<br><input type="checkbox"/> <b>DS07</b>  |
| <b>DS06.</b> Do you have difficulty walking or moving, holding, reaching, climbing stairs even when using a walking aid/prosthesis/support device? | 01. No difficulty                                                                                                                                                                                                                                                                                                                                                                                                                                                                                                                                | 02. Having a little difficulty | 03. Having a lot of difficulties  | 04. Absolutely not possible | N/A                                          |
| <b>DS07.</b> Have you had difficulty remembering or concentrating for more than the last 6 months?                                                 | 01. No difficulty                                                                                                                                                                                                                                                                                                                                                                                                                                                                                                                                | 02. Having a little difficulty | 03. Having a lot of difficulties  | 04. Absolutely not possible | N/A                                          |
| <b>DS08.</b> Have you had difficulty caring for/cleaning yourself, such as bathing or dressing, for more than the last 6 months?                   | 01. No difficulty<br><input type="checkbox"/> <b>DS010</b>                                                                                                                                                                                                                                                                                                                                                                                                                                                                                       | 02. Having a little difficulty | 03. Having a lot of difficulties  | 04. Absolutely not possible | N/A<br><input type="checkbox"/> <b>DS010</b> |
| <b>DS09.</b> Do you have difficulty caring for/cleaning yourself, such as bathing or dressing, even with a companion?                              | 01. No difficulty                                                                                                                                                                                                                                                                                                                                                                                                                                                                                                                                | 02. Having a little difficulty | 03. Having a lot of difficulties  | 04. Absolutely not possible | N/A                                          |
| <b>DS10.</b> Have you had difficulty communicating or being understood for more than the last 6 months?                                            | 01. No difficulty<br><input type="checkbox"/> <b>DS12</b>                                                                                                                                                                                                                                                                                                                                                                                                                                                                                        | 02. Having a little difficulty | 03. Having a lot of difficulties  | 04. Absolutely not possible | N/A<br><input type="checkbox"/> <b>DS12</b>  |
| <b>DS11.</b> Do you have difficulty communicating or being understood even when using everyday language or with aids/assistants?                   | 01. No difficulty                                                                                                                                                                                                                                                                                                                                                                                                                                                                                                                                | 02. Having a little difficulty | 03. Having a lot of difficulties  | 04. Absolutely not possible | N/A                                          |
| <b>DS12.</b> Have you experienced emotional and/or behavioural difficulties/disorders for more than the last 6 months?                             | 01. No difficulty<br><input type="checkbox"/> <b>DS14</b>                                                                                                                                                                                                                                                                                                                                                                                                                                                                                        | 02. Having a little difficulty | 03. Having a lot of difficulties  | 04. Absolutely not possible | N/A<br><input type="checkbox"/> <b>DS14</b>  |
| <b>DS13.</b> Do you experience emotional and/or behavioural difficulties/disorders even though you have received therapy?                          | 01. No difficulty                                                                                                                                                                                                                                                                                                                                                                                                                                                                                                                                | 02. Having a little difficulty | 03. Having a lot of difficulties  | 04. Absolutely not possible | N/A                                          |
| <b>DS14.</b> Do you need any aids for walking/moving around?                                                                                       | 01. Yes<br>03. No                                                                                                                                                                                                                                                                                                                                                                                                                                                                                                                                |                                |                                   |                             |                                              |
| <b>DS15.</b> Do you have any other chronic illnesses?                                                                                              | 01. Yes<br>03. No <input type="checkbox"/> <b>DS17</b>                                                                                                                                                                                                                                                                                                                                                                                                                                                                                           |                                |                                   |                             |                                              |
| <b>DS16.</b> What other chronic diseases do you have?<br><br><i>(can select more than one)</i>                                                     | <input type="checkbox"/> Diabetes<br><input type="checkbox"/> Hypertension<br><input type="checkbox"/> Heart disease<br><input type="checkbox"/> Stroke<br><input type="checkbox"/> Acute respiratory disease<br><input type="checkbox"/> Kidney problems<br><input type="checkbox"/> Cancer<br><input type="checkbox"/> Liver disease<br><input type="checkbox"/> Thyroid<br><input type="checkbox"/> Mental condition<br><input type="checkbox"/> autoimmune disease<br><input type="checkbox"/> HIV/AIDS<br><input type="checkbox"/> Epilepsy |                                |                                   |                             |                                              |

|                                                                                                                                                                                                                                                                                                     |                                                                                               |
|-----------------------------------------------------------------------------------------------------------------------------------------------------------------------------------------------------------------------------------------------------------------------------------------------------|-----------------------------------------------------------------------------------------------|
|                                                                                                                                                                                                                                                                                                     | <input type="checkbox"/> Other, _____<br><input type="checkbox"/> Don't know/ haven't checked |
| <b>Enumerator Note:</b> Read the following statement to the patient:<br><i>"The following questions ask whether you are currently suffering from other illnesses, such as worm infestation or malaria. These questions are asked because these two conditions can also affect TB test results."</i> |                                                                                               |
| <b>DS17.</b> Are you currently suffering from worms?                                                                                                                                                                                                                                                | 01. Yes<br>03. No                                                                             |
| <b>DS18.</b> Are you currently suffering from malaria?                                                                                                                                                                                                                                              | 01. Yes<br>03. No                                                                             |

**FORM 04 TB AWARENESS (AW)**  
**(filled in by the enumerator from the patient interview)**

| <b>KNOWLEDGE AND AWARENESS ABOUT TB (AW)</b>                                                                                                                                                                                                                                              |                                                                                                                                                                                                                                                                                                                                                                                     |
|-------------------------------------------------------------------------------------------------------------------------------------------------------------------------------------------------------------------------------------------------------------------------------------------|-------------------------------------------------------------------------------------------------------------------------------------------------------------------------------------------------------------------------------------------------------------------------------------------------------------------------------------------------------------------------------------|
| <b>Instruction for enumerators:</b> Read the following statement to the patient:<br><i>"I will now ask about your knowledge about TB."</i>                                                                                                                                                |                                                                                                                                                                                                                                                                                                                                                                                     |
| <b>AW01.</b> Have you ever heard of tuberculosis?                                                                                                                                                                                                                                         | 01. Yes<br>03. No                                                                                                                                                                                                                                                                                                                                                                   |
| <b>AW02.</b> How is TB or tuberculosis transmitted?<br><br><i>(Note for enumerators: Do not read out answer choices unless clarification is needed.</i><br><br><i>Check all the appropriate answers. If in doubt, ask, "Could you tell me more about how people contracted with TB?")</i> | A. Inhaling air containing TB bacteria when someone with active TB coughs or sneezes or spits carelessly.<br>B. Prolonged close contact with an individual diagnosed with active TB.<br>C. Living or working in crowded, poorly ventilated spaces<br>D. Contact with sputum from an infected person<br>E. Living with an untreated TB patient<br>95. Others _____<br>98. Don't know |
| <b>AW03.</b> What are the symptoms of TB that you know?<br><br><i>(Note for enumerators: Do not read out answer choices unless clarification is needed.</i><br><br><i>Check all appropriate answers. If in doubt, ask, "Could you tell me more about other symptoms of TB?")</i>          | A. Long cough<br>B. Fever<br>C. Loss of appetite<br>D. Cold sweats at night<br>E. Weight loss<br>95. Others _____<br>98. Don't know                                                                                                                                                                                                                                                 |
| <b>AW04.</b> Do you know if you are currently undergoing TB examination or treatment?                                                                                                                                                                                                     | 01. Yes<br>03. No                                                                                                                                                                                                                                                                                                                                                                   |
| <b>RESPONDENT'S SURROUNDING ENVIRONMENT</b>                                                                                                                                                                                                                                               |                                                                                                                                                                                                                                                                                                                                                                                     |
| <b>AW05.</b> Have you had a history of close contact with someone living with TB?                                                                                                                                                                                                         | 01. Yes<br>03. No                                                                                                                                                                                                                                                                                                                                                                   |
| <b>AW06.</b> Do you have any windows in your house?                                                                                                                                                                                                                                       | 01. Yes<br>03. No                                                                                                                                                                                                                                                                                                                                                                   |
| <b>AW07.</b> Is your house exposed to direct sunlight?                                                                                                                                                                                                                                    | 01. Yes<br>03. No                                                                                                                                                                                                                                                                                                                                                                   |

**FORM 05 ACCESSIBILITY, DELAY, EXPERIENCE IN ACCESSING TB SERVICES  
(AC, TR)**

**(filled in by the enumerator from the patient interview)**

| <b>ACCESS TO TB SERVICES (AC)</b>                                                                                                                                                                                                                          |                                                                                                                                                                                                                                                                                                                                                                                                                                                                                                                                                                                                                                                                                                                                                                                                                                   |
|------------------------------------------------------------------------------------------------------------------------------------------------------------------------------------------------------------------------------------------------------------|-----------------------------------------------------------------------------------------------------------------------------------------------------------------------------------------------------------------------------------------------------------------------------------------------------------------------------------------------------------------------------------------------------------------------------------------------------------------------------------------------------------------------------------------------------------------------------------------------------------------------------------------------------------------------------------------------------------------------------------------------------------------------------------------------------------------------------------|
| <b>DATA CHECK FOR PATIENT TYPE</b>                                                                                                                                                                                                                         | 01. TB Diagnosis<br>03. TB care/treatment (including control/taking medication and referral due to complications)                                                                                                                                                                                                                                                                                                                                                                                                                                                                                                                                                                                                                                                                                                                 |
| <b>AC01.</b> Check whether the patient data is for TB diagnosis or treatment.                                                                                                                                                                              |                                                                                                                                                                                                                                                                                                                                                                                                                                                                                                                                                                                                                                                                                                                                                                                                                                   |
| <b>TB TREATMENT DELAY INFORMATION</b>                                                                                                                                                                                                                      |                                                                                                                                                                                                                                                                                                                                                                                                                                                                                                                                                                                                                                                                                                                                                                                                                                   |
| <i>Instruction for enumerator: Read the following statement to the patient:<br/>" I will ask you several things about your disease and your experiences in seeking for TB health services."</i>                                                            |                                                                                                                                                                                                                                                                                                                                                                                                                                                                                                                                                                                                                                                                                                                                                                                                                                   |
| <b>AC02.</b> When do you think you first experienced TB symptoms?<br><br><i>(Fill in the format most appropriate to the respondent's answer)</i>                                                                                                           | <input type="text"/> <input type="text"/> <input type="text"/> <input type="text"/> day<br><input type="text"/> <input type="text"/> <input type="text"/> <input type="text"/> week<br><input type="text"/> <input type="text"/> <input type="text"/> <input type="text"/> month<br><input type="checkbox"/> Never thought/felt I had TB before today                                                                                                                                                                                                                                                                                                                                                                                                                                                                             |
| <b>AC03.</b> Did you experience any of the following symptoms before deciding to undergo the current treatment?<br><br>And for how many weeks did you experience these symptoms before seeking treatment?<br><br><i>(read out each symptom)</i>            |                                                                                                                                                                                                                                                                                                                                                                                                                                                                                                                                                                                                                                                                                                                                                                                                                                   |
| AC03a Cough                                                                                                                                                                                                                                                | <input type="checkbox"/> YES, ___ days ___ weeks ___ months <input type="checkbox"/> NO                                                                                                                                                                                                                                                                                                                                                                                                                                                                                                                                                                                                                                                                                                                                           |
| AC03b Cold sweats at night                                                                                                                                                                                                                                 | <input type="checkbox"/> YES, ___ days ___ weeks ___ months <input type="checkbox"/> NO                                                                                                                                                                                                                                                                                                                                                                                                                                                                                                                                                                                                                                                                                                                                           |
| AC03c Persistent fever                                                                                                                                                                                                                                     | <input type="checkbox"/> YES, ___ days ___ weeks ___ months <input type="checkbox"/> NO                                                                                                                                                                                                                                                                                                                                                                                                                                                                                                                                                                                                                                                                                                                                           |
| AC03d Weight loss                                                                                                                                                                                                                                          | <input type="checkbox"/> YES, ___ days ___ weeks ___ months <input type="checkbox"/> NO                                                                                                                                                                                                                                                                                                                                                                                                                                                                                                                                                                                                                                                                                                                                           |
| AC03e Chest pain                                                                                                                                                                                                                                           | <input type="checkbox"/> YES, ___ days ___ weeks ___ months <input type="checkbox"/> NO                                                                                                                                                                                                                                                                                                                                                                                                                                                                                                                                                                                                                                                                                                                                           |
| AC03f Shortness of breath                                                                                                                                                                                                                                  | <input type="checkbox"/> YES, ___ days ___ weeks ___ months <input type="checkbox"/> NO                                                                                                                                                                                                                                                                                                                                                                                                                                                                                                                                                                                                                                                                                                                                           |
| AC03g Easily tired                                                                                                                                                                                                                                         | <input type="checkbox"/> YES, ___ days ___ weeks ___ months <input type="checkbox"/> NO                                                                                                                                                                                                                                                                                                                                                                                                                                                                                                                                                                                                                                                                                                                                           |
| AC03h No appetite                                                                                                                                                                                                                                          | <input type="checkbox"/> YES, ___ days ___ weeks ___ months <input type="checkbox"/> NO                                                                                                                                                                                                                                                                                                                                                                                                                                                                                                                                                                                                                                                                                                                                           |
| AC03i Coughing up blood                                                                                                                                                                                                                                    | <input type="checkbox"/> YES, ___ days ___ weeks ___ months <input type="checkbox"/> NO                                                                                                                                                                                                                                                                                                                                                                                                                                                                                                                                                                                                                                                                                                                                           |
| AC03i Others (please specify)                                                                                                                                                                                                                              | <input type="checkbox"/> YES, ___ days ___ weeks ___ months <input type="checkbox"/> NO                                                                                                                                                                                                                                                                                                                                                                                                                                                                                                                                                                                                                                                                                                                                           |
| <b>AC04.</b> Have you ever delayed/avoided seeking TB services?                                                                                                                                                                                            | 01. Yes<br>03. No <input type="checkbox"/> <b>AC06</b>                                                                                                                                                                                                                                                                                                                                                                                                                                                                                                                                                                                                                                                                                                                                                                            |
| <b>AC05.</b> Why have you ever delayed/avoided seeking TB services?<br><br><i>(can select more than one)</i><br><br><i>(Let the respondent answer first, then ask again: "Are there any other reasons that make you delay/avoid seeking TB services?")</i> | A. The cost is too high<br>B. Health facilities are too far / difficult to reach<br>C. No transportation or expensive transportation costs<br>D. Long waiting times at health facilities<br>E. Have to work / can't leave work<br>F. There is no one to accompany<br>G. Not feeling seriously ill / symptoms are considered mild<br>H. Fear of being diagnosed with TB<br>I. Fear of stigma from neighbors/society<br>J. Not permitted by partner/family<br>K. Fear of side effects or treatment<br>L. Have you ever had a bad experience with staff/facilities?<br>M. Don't know where to look for TB services<br>N. Don't trust free TB services / worried about quality of treatment<br>O. Health facilities are less disability friendly<br>P. Use traditional/alternative medicine first<br>Q. Others, please specify: _____ |
| <b>AC06.</b> Where did you seek treatment for the above symptoms?<br><br><i>(Ask about all health facilities the respondent has visited)</i>                                                                                                               | 01. Inpatient public Primary Health Center/Puskesmas<br>02. Non-Inpatient public Primary Health Center/Puskesmas<br>03. Village Health Post<br>04. Village midwife<br>05. Balkesmas<br>06. Type D hospital<br>07. Type C hospital<br>08. Type B hospital<br>09. Type A hospital<br>10. Private General Practitioner Clinic (sole or joint practice)<br>11. General Practitioner (home practice)<br>12. Private maternity clinics (sole or joint practice)<br>13. Private Midwifery Practice (BPM), home practice<br>14. Private Hospital                                                                                                                                                                                                                                                                                          |

|                                                                                                                                                                                                                                                                                                                   |                                                                                                                                                                                                                                                                                                                                                              |
|-------------------------------------------------------------------------------------------------------------------------------------------------------------------------------------------------------------------------------------------------------------------------------------------------------------------|--------------------------------------------------------------------------------------------------------------------------------------------------------------------------------------------------------------------------------------------------------------------------------------------------------------------------------------------------------------|
|                                                                                                                                                                                                                                                                                                                   | 15. Pharmacy/drug store<br>95. Others, please specify: _____                                                                                                                                                                                                                                                                                                 |
| <b>AC07.</b> Of the health facility options above, which health facility did you visit first for TB service?<br><br><i>(Note for enumerator: just write the number of the health facility visited by the patient. Example: If the patient first visited a Type D government hospital, write 06 in the answer)</i> | _____                                                                                                                                                                                                                                                                                                                                                        |
| <b>AC08.</b> When did you make your first visit?                                                                                                                                                                                                                                                                  | □□□ □□□ (month/year)                                                                                                                                                                                                                                                                                                                                         |
| <b>AC09.</b> If AC06>08: Why didn't you go to a government health facility, such as the public Primary Health Centre (Puskesmas) or the General Hospital, when you first sought treatment?<br><br><i>(Choose all relevant answer/s)</i>                                                                           | A. The distance is too far<br>B. The cost is too high<br>C. Waiting time is too long<br>D. Facilities are incomplete/not available<br>E. No confidence in the quality of government health facilities<br>F. Medicines are not available<br>G. Health facilities are less disability friendly<br>H. No one to accompany/accompany<br>I. Other reason/s, _____ |
| <b>AC10.</b> How far is the government health facility from your house?<br><br><i>(Fill in the format most appropriate to the respondent's answer)</i>                                                                                                                                                            | _____ hours by walking<br>_____ hours by vehicle                                                                                                                                                                                                                                                                                                             |
| <b>AC11.</b> Have you ever sought traditional/alternative treatment for TB?                                                                                                                                                                                                                                       | 01. Yes<br>03. No                                                                                                                                                                                                                                                                                                                                            |

#### Previous TB Treatment History and TB Care Experience (TR)

**Instruction for enumerator:** Read the following statement to the patient:

"I will now ask about your TB treatment history, including any visits you made prior to today".

|                                                                                                                                  |                                                                                                                                                                                                                                                        |
|----------------------------------------------------------------------------------------------------------------------------------|--------------------------------------------------------------------------------------------------------------------------------------------------------------------------------------------------------------------------------------------------------|
| <b>TR01.</b> Before this diagnosis (or the TB treatment you are currently undergoing), have you ever taken TB medication before? | 01. Yes<br>03. No □ <b>TR06</b>                                                                                                                                                                                                                        |
| <b>TR02.</b> Have you completed the treatment?                                                                                   | 01. Yes □ <b>TR04</b><br>03. No                                                                                                                                                                                                                        |
| <b>TR03.</b> Why not?                                                                                                            | A. Felt better already<br>B. Cost constraints<br>C. Drug side effects<br>D. Moved residence<br>E. Distance constraints to health facilities<br>F. Medicine was not available<br>G. Health facilities were not disability-friendly<br>95. Others, _____ |
| <b>TR04.</b> When you were diagnosed with TB, were you given treatment immediately?                                              | 01. Yes □ <b>TR06</b><br>03. No                                                                                                                                                                                                                        |
| <b>TR05.</b> If NO, why?                                                                                                         | A. No supplies/equipment/medication required<br>B. Financial constraints<br>C. Distance/transportation constraints<br>D. Side effects<br>E. Health facilities are less disability friendly<br>95. Others, _____<br>98. Don't know                      |
| <b>TR06.</b> (IF AC01==01□ TR08)<br>Have you ever experienced any problems with the treatment you are currently undergoing?      | 01. Yes<br>03. No □ <b>TR08</b>                                                                                                                                                                                                                        |
| <b>TR07.</b> If YES, why?                                                                                                        | A. No supplies/equipment/medication required<br>B. Financial constraints<br>C. Distance/transportation constraints<br>D. Side effects<br>E. Health facilities are less disability friendly<br>95. Others, _____<br>98. Don't know                      |
| <b>TR08.</b> Have you ever faced any challenges in accessing TB examinations or tests?                                           | 01. Yes<br>03. No □ <b>TR10</b>                                                                                                                                                                                                                        |
| <b>TR09.</b> What are the challenges?<br><br><i>(Choose all relevant answer/s)</i>                                               | A. No supplies/equipment/medication required<br>B. Financial constraints<br>C. Distance/transportation constraints                                                                                                                                     |

|                                                                                              |                                                                                                                        |
|----------------------------------------------------------------------------------------------|------------------------------------------------------------------------------------------------------------------------|
|                                                                                              | D. No health/lab personnel<br>E. Health facilities are less disability friendly<br>95. Others, _____<br>98. Don't know |
| <b>TR10.</b> Are healthcare providers supportive and respectful?                             | 01. Very supportive<br>02. Support<br>03. Does not support<br>04. Very unsupportive                                    |
| <b>TR11.</b> Do cultural or religious beliefs in your community hinder seeking TB treatment? | 01. Yes<br>03. No                                                                                                      |

### IEWS ON TB (STIGMA)

**Instruction for enumerator:** Read the following statement to the patient:

"I will now read some statements that describe how people with TB feel. After I read each statement, please answer whether you agree or disagree that people with TB in your community/near you feel that way. If you agree, I will ask you to what extent you agree or strongly agree. If you disagree, I will ask you to what extent you disagree or strongly disagree. You can refuse to answer any question that makes you uncomfortable."

| Statement                                                                                                     | Strongly disagree        | Disagree                 | Agree                    | Strongly agree           | Refuse to answer         |
|---------------------------------------------------------------------------------------------------------------|--------------------------|--------------------------|--------------------------|--------------------------|--------------------------|
| <b>TR12.</b> I felt hurt by other people's reactions when they found out I had TB.                            | <input type="checkbox"/> |
| <b>TR13.</b> I lost friends when I told them I had TB.                                                        | <input type="checkbox"/> |
| <b>TR14.</b> I feel lonely                                                                                    | <input type="checkbox"/> |
| <b>TR15.</b> I am afraid to go to the TB clinic because other people might see me there.                      | <input type="checkbox"/> |
| <b>TR16.</b> I am afraid to tell people outside my family that I have TB.                                     | <input type="checkbox"/> |
| <b>TR17.</b> I am afraid to tell others that I have TB because they might think I also have HIV/AIDS.         | <input type="checkbox"/> |
| <b>TR18.</b> I feel guilty because my family is bearing the burden of taking care of me.                      | <input type="checkbox"/> |
| <b>TR19.</b> I choose carefully who I tell about my TB                                                        | <input type="checkbox"/> |
| <b>TR20.</b> I feel guilty about getting TB because of smoking, drinking alcohol, or other risky behaviours.  | <input type="checkbox"/> |
| <b>TR21.</b> I am worried I have HIV/AIDS                                                                     | <input type="checkbox"/> |
| <b>TR22.</b> I am afraid that other people will tell my family that I have TB.                                | <input type="checkbox"/> |
| <b>TR23.</b> In your opinion, what would make TB care more accessible to you?                                 | [open answer]            |                          |                          |                          |                          |
| <b>TR24.</b> Before today's visit, how many times have you been to the facility for TB examination/treatment? | _____ times              |                          |                          |                          |                          |

**FORM 06 TB SERVICE FEE (FC)**  
**(filled in by the enumerator from the patient interview)**

**Instruction for enumerators:** This section asks for all visits to health facilities that respondents have made for their TB symptoms/illness.

**COST OF DIAGNOSIS & TREATMENT OF TB PATIENTS**

**Instruction for enumerators:** Read the following statement to the patient:

“Earlier, you said that you had been to a health facility [ ] times before today’s visit. So, I would like to ask about the costs you have incurred, both for today’s visit and the previous [ ] visit. Let’s start with today’s visit.”

Interview notes:

- The visits asked about start from the most recent visit or the respondent’s most recent visit and are for diagnosis only (if **AC01 == 01**) or for treatment only (if **AC01 == 03**).
- If the patient does not know the amount of the bill, write “99”

**DATA CHECK FOR PATIENT TYPE**

|                                                                                      |                                                                                                                                                        |
|--------------------------------------------------------------------------------------|--------------------------------------------------------------------------------------------------------------------------------------------------------|
| Check whether the patient data is for TB diagnosis or treatment (FROM <b>AC01</b> ). | 01. TB Diagnosis<br>03. TB care/treatment (including control/taking medication and referral due to complications) <input type="checkbox"/> <b>FC20</b> |
| Fill in from <b>TR24</b> : Number of visits                                          | [ ] times                                                                                                                                              |

**TB DIAGNOSIS PATIENT COSTS**

|              | <b>FC01.</b>                            | <b>FC02.</b>     | <b>FC03.</b>                                 | <b>FC04.</b>                                                             | <b>FC05.</b>                                                                                                          | <b>FC06.</b>                                                                                                           | <b>FC07.</b>                                                                 | <b>FC08.</b>                                                                                                                                      | <b>FC09.</b>                                                                                | <b>FC10.</b>                                                                                                  | <b>FC11.</b>               |
|--------------|-----------------------------------------|------------------|----------------------------------------------|--------------------------------------------------------------------------|-----------------------------------------------------------------------------------------------------------------------|------------------------------------------------------------------------------------------------------------------------|------------------------------------------------------------------------------|---------------------------------------------------------------------------------------------------------------------------------------------------|---------------------------------------------------------------------------------------------|---------------------------------------------------------------------------------------------------------------|----------------------------|
|              | Visiting date                           | Service Provider | Total time per visit (including travel time) | Administrative costs<br>How much do you spend on medical administration? | Lab Test Fees<br>How much did you pay for the laboratory test?<br><br>(for sputum tests or others except Chest X-ray) | Chest X-ray Cost<br>ray cost?<br><br>(including sending images to the radiologist, travel costs, and related expenses) | Drug Costs<br>How much do you spend on medicine?<br><br>(total of all types) | Travel expense<br>How much does transportation cost during treatment?<br><br>(round trip, including costs of going to the lab, chest X-ray, etc.) | Meal cost<br>How much does your meal cost during your first treatment visit?<br><br>(total) | Accommodation Fees<br>How much will your accommodation cost during your first treatment visit?<br><br>(total) | Subtotal Cost per Visit    |
| Visit 1      | [ ] [ ] [ ] [ ] [ ] [ ]<br>(month/year) | [ ] [ ]          | [ ] [ ] [ ] [ ] [ ] [ ]<br>hours             | Rp [ ] [ ] [ ] [ ] [ ] [ ]                                               | Rp [ ] [ ] [ ] [ ] [ ] [ ]                                                                                            | Rp [ ] [ ] [ ] [ ] [ ] [ ]                                                                                             | Rp [ ] [ ] [ ] [ ] [ ] [ ]                                                   | Rp [ ] [ ] [ ] [ ] [ ] [ ]                                                                                                                        | Rp [ ] [ ] [ ] [ ] [ ] [ ]                                                                  | Rp [ ] [ ] [ ] [ ] [ ] [ ]                                                                                    | Rp [ ] [ ] [ ] [ ] [ ] [ ] |
| Visit 2      | [ ] [ ] [ ] [ ] [ ] [ ]<br>(month/year) | [ ] [ ]          | [ ] [ ] [ ] [ ] [ ] [ ]<br>hours             | Rp [ ] [ ] [ ] [ ] [ ] [ ]                                               | Rp [ ] [ ] [ ] [ ] [ ] [ ]                                                                                            | Rp [ ] [ ] [ ] [ ] [ ] [ ]                                                                                             | Rp [ ] [ ] [ ] [ ] [ ] [ ]                                                   | Rp [ ] [ ] [ ] [ ] [ ] [ ]                                                                                                                        | Rp [ ] [ ] [ ] [ ] [ ] [ ]                                                                  | Rp [ ] [ ] [ ] [ ] [ ] [ ]                                                                                    | Rp [ ] [ ] [ ] [ ] [ ] [ ] |
| Visit 3      | [ ] [ ] [ ] [ ] [ ] [ ]<br>(month/year) | [ ] [ ]          | [ ] [ ] [ ] [ ] [ ] [ ]<br>hours             | Rp [ ] [ ] [ ] [ ] [ ] [ ]                                               | Rp [ ] [ ] [ ] [ ] [ ] [ ]                                                                                            | Rp [ ] [ ] [ ] [ ] [ ] [ ]                                                                                             | Rp [ ] [ ] [ ] [ ] [ ] [ ]                                                   | Rp [ ] [ ] [ ] [ ] [ ] [ ]                                                                                                                        | Rp [ ] [ ] [ ] [ ] [ ] [ ]                                                                  | Rp [ ] [ ] [ ] [ ] [ ] [ ]                                                                                    | Rp [ ] [ ] [ ] [ ] [ ] [ ] |
| Visit 4      | [ ] [ ] [ ] [ ] [ ] [ ]<br>(month/year) | [ ] [ ]          | [ ] [ ] [ ] [ ] [ ] [ ]<br>hours             | Rp [ ] [ ] [ ] [ ] [ ] [ ]                                               | Rp [ ] [ ] [ ] [ ] [ ] [ ]                                                                                            | Rp [ ] [ ] [ ] [ ] [ ] [ ]                                                                                             | Rp [ ] [ ] [ ] [ ] [ ] [ ]                                                   | Rp [ ] [ ] [ ] [ ] [ ] [ ]                                                                                                                        | Rp [ ] [ ] [ ] [ ] [ ] [ ]                                                                  | Rp [ ] [ ] [ ] [ ] [ ] [ ]                                                                                    | Rp [ ] [ ] [ ] [ ] [ ] [ ] |
| Visit 5      | [ ] [ ] [ ] [ ] [ ] [ ]<br>(month/year) | [ ] [ ]          | [ ] [ ] [ ] [ ] [ ] [ ]<br>hours             | Rp [ ] [ ] [ ] [ ] [ ] [ ]                                               | Rp [ ] [ ] [ ] [ ] [ ] [ ]                                                                                            | Rp [ ] [ ] [ ] [ ] [ ] [ ]                                                                                             | Rp [ ] [ ] [ ] [ ] [ ] [ ]                                                   | Rp [ ] [ ] [ ] [ ] [ ] [ ]                                                                                                                        | Rp [ ] [ ] [ ] [ ] [ ] [ ]                                                                  | Rp [ ] [ ] [ ] [ ] [ ] [ ]                                                                                    | Rp [ ] [ ] [ ] [ ] [ ] [ ] |
| Visit 6      | [ ] [ ] [ ] [ ] [ ] [ ]<br>(month/year) | [ ] [ ]          | [ ] [ ] [ ] [ ] [ ] [ ]<br>hours             | Rp [ ] [ ] [ ] [ ] [ ] [ ]                                               | Rp [ ] [ ] [ ] [ ] [ ] [ ]                                                                                            | Rp [ ] [ ] [ ] [ ] [ ] [ ]                                                                                             | Rp [ ] [ ] [ ] [ ] [ ] [ ]                                                   | Rp [ ] [ ] [ ] [ ] [ ] [ ]                                                                                                                        | Rp [ ] [ ] [ ] [ ] [ ] [ ]                                                                  | Rp [ ] [ ] [ ] [ ] [ ] [ ]                                                                                    | Rp [ ] [ ] [ ] [ ] [ ] [ ] |
| Visit 7      | [ ] [ ] [ ] [ ] [ ] [ ]<br>(month/year) | [ ] [ ]          | [ ] [ ] [ ] [ ] [ ] [ ]<br>hours             | Rp [ ] [ ] [ ] [ ] [ ] [ ]                                               | Rp [ ] [ ] [ ] [ ] [ ] [ ]                                                                                            | Rp [ ] [ ] [ ] [ ] [ ] [ ]                                                                                             | Rp [ ] [ ] [ ] [ ] [ ] [ ]                                                   | Rp [ ] [ ] [ ] [ ] [ ] [ ]                                                                                                                        | Rp [ ] [ ] [ ] [ ] [ ] [ ]                                                                  | Rp [ ] [ ] [ ] [ ] [ ] [ ]                                                                                    | Rp [ ] [ ] [ ] [ ] [ ] [ ] |
| Visit 8      | [ ] [ ] [ ] [ ] [ ] [ ]<br>(month/year) | [ ] [ ]          | [ ] [ ] [ ] [ ] [ ] [ ]<br>hours             | Rp [ ] [ ] [ ] [ ] [ ] [ ]                                               | Rp [ ] [ ] [ ] [ ] [ ] [ ]                                                                                            | Rp [ ] [ ] [ ] [ ] [ ] [ ]                                                                                             | Rp [ ] [ ] [ ] [ ] [ ] [ ]                                                   | Rp [ ] [ ] [ ] [ ] [ ] [ ]                                                                                                                        | Rp [ ] [ ] [ ] [ ] [ ] [ ]                                                                  | Rp [ ] [ ] [ ] [ ] [ ] [ ]                                                                                    | Rp [ ] [ ] [ ] [ ] [ ] [ ] |
| Visit 9      | [ ] [ ] [ ] [ ] [ ] [ ]<br>(month/year) | [ ] [ ]          | [ ] [ ] [ ] [ ] [ ] [ ]<br>hours             | Rp [ ] [ ] [ ] [ ] [ ] [ ]                                               | Rp [ ] [ ] [ ] [ ] [ ] [ ]                                                                                            | Rp [ ] [ ] [ ] [ ] [ ] [ ]                                                                                             | Rp [ ] [ ] [ ] [ ] [ ] [ ]                                                   | Rp [ ] [ ] [ ] [ ] [ ] [ ]                                                                                                                        | Rp [ ] [ ] [ ] [ ] [ ] [ ]                                                                  | Rp [ ] [ ] [ ] [ ] [ ] [ ]                                                                                    | Rp [ ] [ ] [ ] [ ] [ ] [ ] |
| <b>TOTAL</b> |                                         |                  |                                              |                                                                          |                                                                                                                       |                                                                                                                        |                                                                              |                                                                                                                                                   |                                                                                             |                                                                                                               |                            |

(continued from the table above)

|              | <b>FC12.</b>                                                                           | <b>FC13.</b>                        | <b>FC14.</b>                           | <b>FC15.</b>                                                                           | <b>FC16.</b>                                     | <b>FC17.</b>                                                                           | <b>FC18.</b>                                                                           | <b>FC19.</b>                                                                                       |
|--------------|----------------------------------------------------------------------------------------|-------------------------------------|----------------------------------------|----------------------------------------------------------------------------------------|--------------------------------------------------|----------------------------------------------------------------------------------------|----------------------------------------------------------------------------------------|----------------------------------------------------------------------------------------------------|
|              | Reduced patient income due to having to undergo TB treatment                           | Reimbursement of costs by insurance | Reimbursement for what?<br>IF FC13==01 | Amount of insurance replacement<br>IF FC13==01                                         | Was someone else present during the examination? | Transportation costs for companions (total round trip)<br>IF FC16==01                  | Accompanying accommodation costs (total)<br>IF FC16==01                                | The companion's income is reduced due to accompanying the patient for TB treatment.<br>IF FC16==01 |
| Visit 1      | Rp <input type="text"/> <input type="text"/> <input type="text"/> <input type="text"/> | 01. YES 03. NO                      | <input type="text"/>                   | Rp <input type="text"/> <input type="text"/> <input type="text"/> <input type="text"/> | 01. YES 03. NO                                   | Rp <input type="text"/> <input type="text"/> <input type="text"/> <input type="text"/> | Rp <input type="text"/> <input type="text"/> <input type="text"/> <input type="text"/> | Rp <input type="text"/> <input type="text"/> <input type="text"/> <input type="text"/>             |
| Visit 2      | Rp <input type="text"/> <input type="text"/> <input type="text"/> <input type="text"/> | 01. YES 03. NO                      | <input type="text"/>                   | Rp <input type="text"/> <input type="text"/> <input type="text"/> <input type="text"/> | 01. YES 03. NO                                   | Rp <input type="text"/> <input type="text"/> <input type="text"/> <input type="text"/> | Rp <input type="text"/> <input type="text"/> <input type="text"/> <input type="text"/> | Rp <input type="text"/> <input type="text"/> <input type="text"/> <input type="text"/>             |
| Visit 3      | Rp <input type="text"/> <input type="text"/> <input type="text"/> <input type="text"/> | 01. YES 03. NO                      | <input type="text"/>                   | Rp <input type="text"/> <input type="text"/> <input type="text"/> <input type="text"/> | 01. YES 03. NO                                   | Rp <input type="text"/> <input type="text"/> <input type="text"/> <input type="text"/> | Rp <input type="text"/> <input type="text"/> <input type="text"/> <input type="text"/> | Rp <input type="text"/> <input type="text"/> <input type="text"/> <input type="text"/>             |
| Visit 4      | Rp <input type="text"/> <input type="text"/> <input type="text"/> <input type="text"/> | 01. YES 03. NO                      | <input type="text"/>                   | Rp <input type="text"/> <input type="text"/> <input type="text"/> <input type="text"/> | 01. YES 03. NO                                   | Rp <input type="text"/> <input type="text"/> <input type="text"/> <input type="text"/> | Rp <input type="text"/> <input type="text"/> <input type="text"/> <input type="text"/> | Rp <input type="text"/> <input type="text"/> <input type="text"/> <input type="text"/>             |
| Visit 5      | Rp <input type="text"/> <input type="text"/> <input type="text"/> <input type="text"/> | 01. YES 03. NO                      | <input type="text"/>                   | Rp <input type="text"/> <input type="text"/> <input type="text"/> <input type="text"/> | 01. YES 03. NO                                   | Rp <input type="text"/> <input type="text"/> <input type="text"/> <input type="text"/> | Rp <input type="text"/> <input type="text"/> <input type="text"/> <input type="text"/> | Rp <input type="text"/> <input type="text"/> <input type="text"/> <input type="text"/>             |
| Visit 6      | Rp <input type="text"/> <input type="text"/> <input type="text"/> <input type="text"/> | 01. YES 03. NO                      | <input type="text"/>                   | Rp <input type="text"/> <input type="text"/> <input type="text"/> <input type="text"/> | 01. YES 03. NO                                   | Rp <input type="text"/> <input type="text"/> <input type="text"/> <input type="text"/> | Rp <input type="text"/> <input type="text"/> <input type="text"/> <input type="text"/> | Rp <input type="text"/> <input type="text"/> <input type="text"/> <input type="text"/>             |
| Visit 7      | Rp <input type="text"/> <input type="text"/> <input type="text"/> <input type="text"/> | 01. YES 03. NO                      | <input type="text"/>                   | Rp <input type="text"/> <input type="text"/> <input type="text"/> <input type="text"/> | 01. YES 03. NO                                   | Rp <input type="text"/> <input type="text"/> <input type="text"/> <input type="text"/> | Rp <input type="text"/> <input type="text"/> <input type="text"/> <input type="text"/> | Rp <input type="text"/> <input type="text"/> <input type="text"/> <input type="text"/>             |
| Visit 8      | Rp <input type="text"/> <input type="text"/> <input type="text"/> <input type="text"/> | 01. YES 03. NO                      | <input type="text"/>                   | Rp <input type="text"/> <input type="text"/> <input type="text"/> <input type="text"/> | 01. YES 03. NO                                   | Rp <input type="text"/> <input type="text"/> <input type="text"/> <input type="text"/> | Rp <input type="text"/> <input type="text"/> <input type="text"/> <input type="text"/> | Rp <input type="text"/> <input type="text"/> <input type="text"/> <input type="text"/>             |
| Visit 9      | Rp <input type="text"/> <input type="text"/> <input type="text"/> <input type="text"/> | 01. YES 03. NO                      | <input type="text"/>                   | Rp <input type="text"/> <input type="text"/> <input type="text"/> <input type="text"/> | 01. YES 03. NO                                   | Rp <input type="text"/> <input type="text"/> <input type="text"/> <input type="text"/> | Rp <input type="text"/> <input type="text"/> <input type="text"/> <input type="text"/> | Rp <input type="text"/> <input type="text"/> <input type="text"/> <input type="text"/>             |
| <b>TOTAL</b> |                                                                                        |                                     |                                        |                                                                                        |                                                  |                                                                                        |                                                                                        |                                                                                                    |

**Code for FC02:**

- 01. Inpatient Health Center
- 02. Non-Inpatient Health Center
- 03. Village Health Post
- 04. Village Midwife
- 05. Health Center
- 06. Type D hospital
- 07. Type C hospital
- 08. Type B hospital
- 09. Type A hospital
- 10. Private General Practitioner Clinic (sole or joint practice)
- 11. Private General Practitioner Clinic (joint practice)
- 12. General Practitioner Practice at Home
- 13. Private maternity clinics (sole or joint practice)
- 14. Private maternity clinic (joint practice)
- 15. Private Midwifery Practice (BPM), Home Based
- 16. Private Hospital
- 17. Pharmacy/drug store

**TB TREATMENT PATIENT COSTS**

|              | <b>FC20.</b>     | <b>FC21.</b>                                                      | <b>FC22.</b>                                 | <b>FC23.</b>                                                          | <b>FC24.</b>                                                                                                | <b>FC25.</b>                                                                                                  | <b>FC26.</b>                                                       | <b>FC27.</b>                                                                                  | <b>FC28.</b>                                                                      | <b>FC29.</b>                                                                                        | <b>FC30.</b>            |
|--------------|------------------|-------------------------------------------------------------------|----------------------------------------------|-----------------------------------------------------------------------|-------------------------------------------------------------------------------------------------------------|---------------------------------------------------------------------------------------------------------------|--------------------------------------------------------------------|-----------------------------------------------------------------------------------------------|-----------------------------------------------------------------------------------|-----------------------------------------------------------------------------------------------------|-------------------------|
|              | Service Provider | How long does it take to arrive at the health facility (one way)? | Total time per visit (including travel time) | Administrative costs How much do you spend on medical administration? | Lab Test Fees How much did you pay for the laboratory test? (for sputum tests or others except Chest X-ray) | Chest X-ray Cost ray cost ? (including sending images to the radiologist, travel costs, and related expenses) | Drug Costs How much do you spend on medicine? (total of all types) | Transportation costs How much does transportation cost for a round trip to a health facility? | Meal cost How much does your meal cost during your first treatment visit? (total) | Accommodation Fees How much will your accommodation cost during your first treatment visit? (total) | Subtotal Cost per Visit |
| Visit 1      | _____            | _____ minutes walking<br>_____ minutes by vehicle                 | _____ hours                                  | Rp _____                                                              | Rp _____                                                                                                    | Rp _____                                                                                                      | Rp _____                                                           | Rp _____                                                                                      | Rp _____                                                                          | Rp _____                                                                                            | Rp _____                |
| Visit 2      | _____            | _____ minutes walking                                             | _____ hours                                  | Rp _____                                                              | Rp _____                                                                                                    | Rp _____                                                                                                      | Rp _____                                                           | Rp _____                                                                                      | Rp _____                                                                          | Rp _____                                                                                            | Rp _____                |
| Visit 3      | _____            | _____ minutes by vehicle                                          | _____ hours                                  | Rp _____                                                              | Rp _____                                                                                                    | Rp _____                                                                                                      | Rp _____                                                           | Rp _____                                                                                      | Rp _____                                                                          | Rp _____                                                                                            | Rp _____                |
| Visit 4      | _____            | _____ minutes walking                                             | _____ hours                                  | Rp _____                                                              | Rp _____                                                                                                    | Rp _____                                                                                                      | Rp _____                                                           | Rp _____                                                                                      | Rp _____                                                                          | Rp _____                                                                                            | Rp _____                |
| Visit 5      | _____            | _____ minutes by vehicle                                          | _____ hours                                  | Rp _____                                                              | Rp _____                                                                                                    | Rp _____                                                                                                      | Rp _____                                                           | Rp _____                                                                                      | Rp _____                                                                          | Rp _____                                                                                            | Rp _____                |
| Visit 6      | _____            | _____ minutes walking                                             | _____ hours                                  | Rp _____                                                              | Rp _____                                                                                                    | Rp _____                                                                                                      | Rp _____                                                           | Rp _____                                                                                      | Rp _____                                                                          | Rp _____                                                                                            | Rp _____                |
| Visit 7      | _____            | _____ minutes by vehicle                                          | _____ hours                                  | Rp _____                                                              | Rp _____                                                                                                    | Rp _____                                                                                                      | Rp _____                                                           | Rp _____                                                                                      | Rp _____                                                                          | Rp _____                                                                                            | Rp _____                |
| Visit 8      | _____            | _____ minutes walking                                             | _____ hours                                  | Rp _____                                                              | Rp _____                                                                                                    | Rp _____                                                                                                      | Rp _____                                                           | Rp _____                                                                                      | Rp _____                                                                          | Rp _____                                                                                            | Rp _____                |
| Visit 9      | _____            | _____ minutes by vehicle                                          | _____ hours                                  | Rp _____                                                              | Rp _____                                                                                                    | Rp _____                                                                                                      | Rp _____                                                           | Rp _____                                                                                      | Rp _____                                                                          | Rp _____                                                                                            | Rp _____                |
| <b>TOTAL</b> |                  |                                                                   |                                              |                                                                       |                                                                                                             |                                                                                                               |                                                                    |                                                                                               |                                                                                   |                                                                                                     |                         |

(continued from the table above)

|              | <b>FC31.</b>                                                 | <b>FC32.</b>                        | <b>FC33.</b>                        | <b>FC34.</b>                                | <b>FC35.</b>                                     | <b>FC36.</b>                                                       | <b>FC37.</b>                                         | <b>FC38.</b>                                                                        |
|--------------|--------------------------------------------------------------|-------------------------------------|-------------------------------------|---------------------------------------------|--------------------------------------------------|--------------------------------------------------------------------|------------------------------------------------------|-------------------------------------------------------------------------------------|
|              | Reduced patient income due to having to undergo TB treatment | Reimbursement of costs by insurance | Reimbursement for what? IF FC32==01 | Amount of insurance replacement IF FC32==01 | Was someone else present during the examination? | Transportation costs for companions (total round trip) IF FC35==01 | Accompanying accommodation costs (total) IF FC35==01 | The companion's income is reduced due to accompanying the patient for TB treatment. |
| Visit 1      | Rp _____                                                     | 01. YES 03. NO                      | _____                               | Rp _____                                    | 01. YES 03. NO                                   | Rp _____                                                           | Rp _____                                             | Rp _____                                                                            |
| Visit 2      | Rp _____                                                     | 01. YES 03. NO                      | _____                               | Rp _____                                    | 01. YES 03. NO                                   | Rp _____                                                           | Rp _____                                             | Rp _____                                                                            |
| Visit 3      | Rp _____                                                     | 01. YES 03. NO                      | _____                               | Rp _____                                    | 01. YES 03. NO                                   | Rp _____                                                           | Rp _____                                             | Rp _____                                                                            |
| Visit 4      | Rp _____                                                     | 01. YES 03. NO                      | _____                               | Rp _____                                    | 01. YES 03. NO                                   | Rp _____                                                           | Rp _____                                             | Rp _____                                                                            |
| Visit 5      | Rp _____                                                     | 01. YES 03. NO                      | _____                               | Rp _____                                    | 01. YES 03. NO                                   | Rp _____                                                           | Rp _____                                             | Rp _____                                                                            |
| Visit 6      | Rp _____                                                     | 01. YES 03. NO                      | _____                               | Rp _____                                    | 01. YES 03. NO                                   | Rp _____                                                           | Rp _____                                             | Rp _____                                                                            |
| Visit 7      | Rp _____                                                     | 01. YES 03. NO                      | _____                               | Rp _____                                    | 01. YES 03. NO                                   | Rp _____                                                           | Rp _____                                             | Rp _____                                                                            |
| Visit 8      | Rp _____                                                     | 01. YES 03. NO                      | _____                               | Rp _____                                    | 01. YES 03. NO                                   | Rp _____                                                           | Rp _____                                             | Rp _____                                                                            |
| Visit 9      | Rp _____                                                     | 01. YES 03. NO                      | _____                               | Rp _____                                    | 01. YES 03. NO                                   | Rp _____                                                           | Rp _____                                             | Rp _____                                                                            |
| <b>TOTAL</b> |                                                              |                                     |                                     |                                             |                                                  |                                                                    |                                                      |                                                                                     |

**Code for FC20:**

- 01. Inpatient Health Center
- 02. Non-Inpatient Health Center

03. Village Health Post
04. Village Midwife
05. Health Center
06. Type D hospital
07. Type C hospital
08. Type B hospital
09. Type A hospital
10. Private General Practitioner Clinic (sole or joint practice)
11. Private General Practitioner Clinic (joint practice)
12. General Practitioner Practice at Home
13. Private maternity clinics (sole or joint practice)
14. Private maternity clinic (joint practice)
15. Private Midwifery Practice (BPM), Home Based
16. Private Hospital
17. Pharmacy/drug store







**FORM 08 INSURANCE AND ECONOMIC STATUS (JK & EK)**  
**(filled in by the enumerator from the patient interview)**

| <b>PATIENT INSURANCE PROTECTION INFORMATION (JK)</b>                                                                                                                                                                     |                                                                                                                                                                                                                                                |
|--------------------------------------------------------------------------------------------------------------------------------------------------------------------------------------------------------------------------|------------------------------------------------------------------------------------------------------------------------------------------------------------------------------------------------------------------------------------------------|
| <i>Instruction for enumerators: Read the following statement to the patient:<br/>"I will now ask you several things about insurance and the economic status of your household."</i>                                      |                                                                                                                                                                                                                                                |
| <b>JK01.</b> Do you have health insurance from the government or the private sector?                                                                                                                                     | 01. Yes<br>03. No <input type="checkbox"/> JK03                                                                                                                                                                                                |
| <b>JK02.</b> If YES, what type of insurance?<br><br><i>(can select more than one option)</i>                                                                                                                             | A. BPJS Health (Premium Assistance Recipients)<br>B. BPJS Health (paid by employer/institution)<br>C. BPJS Health (paid by yourself/individually)<br>D. Private insurance (with reimbursement)<br>E. Private insurance (without reimbursement) |
| <b>JK03.</b> Who is the main breadwinner in the household?                                                                                                                                                               | 01. Patient<br>02. Others, please specify: _____                                                                                                                                                                                               |
| <b>JK04.</b> Did you work before being diagnosed with TB (including informal work)?                                                                                                                                      | 01. Yes<br>03. No <input type="checkbox"/> JK08                                                                                                                                                                                                |
| <b>JK05.</b> Did you have to stop or take leave from work because of a TB diagnosis?                                                                                                                                     | 01. Yes, quit job<br>02. Yes, take leave from work <input type="checkbox"/> JK07<br>03. No <input type="checkbox"/> JK08                                                                                                                       |
| <b>JK06.</b> Since when did you stop working due to your TB diagnosis?<br><br><i>(fill in the information that best matches the respondent's answer)</i>                                                                 | <input type="text"/> day<br><input type="text"/> week<br><input type="text"/> month<br><input type="checkbox"/> JK08                                                                                                                           |
| <b>JK07.</b> In the last 3 months, on average, how many days per month were you absent from work because you had to undergo a TB test?<br><br><i>(fill in the information that best matches the respondent's answer)</i> | <input type="text"/> day<br><input type="text"/> week<br><input type="text"/> month                                                                                                                                                            |
| <b>JK08.</b> Is there anyone who helps with household chores, and is that person paid because you are undergoing TB testing?                                                                                             | 01. Yes, Rp <input type="text"/> <input type="text"/> <input type="text"/> <input type="text"/><br>03. No                                                                                                                                      |

| <b>Household Income and Expenditures (EK)</b>                                                                                                                                                                                       |                                                                                                                                 |
|-------------------------------------------------------------------------------------------------------------------------------------------------------------------------------------------------------------------------------------|---------------------------------------------------------------------------------------------------------------------------------|
| <i>Instruction for enumerators: Read the following statement to the patient:<br/>"I would like to ask again about your income, but more to find out whether there is a difference before and after you underwent TB treatment."</i> |                                                                                                                                 |
| <b>EK01.</b> What is your estimated average household income BEFORE you were diagnosed with TB?                                                                                                                                     | Rp <input type="text"/> <input type="text"/> <input type="text"/> <input type="text"/>                                          |
| EK01a Total patient income                                                                                                                                                                                                          | Rp <input type="text"/> <input type="text"/> <input type="text"/> <input type="text"/>                                          |
| EK01b Total income from other household members                                                                                                                                                                                     | Rp <input type="text"/> <input type="text"/> <input type="text"/> <input type="text"/>                                          |
| EK01c Social security benefits (e.g., disability assistance, BLT, PKH)                                                                                                                                                              | Rp <input type="text"/> <input type="text"/> <input type="text"/> <input type="text"/>                                          |
| EK01d Government assistance (assistance from villages, social services, ministry of social affairs)                                                                                                                                 | Rp <input type="text"/> <input type="text"/> <input type="text"/> <input type="text"/>                                          |
| EK01e Others, please specify (e.g. Baznas, church assistance, etc.)                                                                                                                                                                 | Rp <input type="text"/> <input type="text"/> <input type="text"/> <input type="text"/>                                          |
| <b>EK02.</b> What is your estimated average household income AFTER being diagnosed with TB?                                                                                                                                         | TOTAL EK02a – EK02e                                                                                                             |
| EK02a Total patient income                                                                                                                                                                                                          | Rp <input type="text"/> <input type="text"/> <input type="text"/> <input type="text"/> <input type="checkbox"/> FILL FROM EK01a |
| EK02b Total income from other household members                                                                                                                                                                                     | Rp <input type="text"/> <input type="text"/> <input type="text"/> <input type="text"/> <input type="checkbox"/> FILL FROM EK01b |
| EK02c Social security benefits (e.g., disability assistance, BLT, PKH)                                                                                                                                                              | Rp <input type="text"/> <input type="text"/> <input type="text"/> <input type="text"/>                                          |
| EK02d Government assistance (assistance from villages, social services, ministry of social affairs)                                                                                                                                 | Rp <input type="text"/> <input type="text"/> <input type="text"/> <input type="text"/>                                          |
| EK02 e Others, please specify (e.g. Baznas, church assistance, etc.)                                                                                                                                                                | Rp <input type="text"/> <input type="text"/> <input type="text"/> <input type="text"/>                                          |

|                                                                                                             |                   |
|-------------------------------------------------------------------------------------------------------------|-------------------|
| <b>EK03. IF EK01 AND EK02 INCOME ARE DIFFERENT:</b><br>Is this difference in income due to your TB disease? | 01. Yes<br>03. No |
|-------------------------------------------------------------------------------------------------------------|-------------------|

===

**INTERVIEW END**

== =
